# Supplementary material for: Internal tides off the Amazon shelf in the western tropical Atlantic: analysis of SWOT Cal/Val mission data
Source: Copernicus journal article supplement (doi:10.5194/os-21-325-2025), 2025-02-04
Supplement: Supplementary file 1 [file os-21-325-2025-supplement.zip]

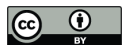

*Supplement of*

**Internal tides off the Amazon shelf in the western tropical Atlantic: analysis of SWOT Cal/Val mission data**

**Michel Tchilibou et al.**

*Correspondence to:* Michel Tchilibou ([mtchilibou@groupcls.com](mailto:mtchilibou@groupcls.com))

- [os-21-325-2025-supplement-title-page.pdf](#)
- [S1\\_total\\_sla\\_\\_ama\\_plot.gif](#)
- [S2\\_sla\\_mode1\\_\\_ama\\_plot.gif](#)
- [S3\\_sla\\_mode2\\_\\_ama\\_plot.gif](#)
- [S4\\_sla\\_higher\\_mode\\_\\_ama\\_plot.gif](#)

The copyright of individual parts of the supplement might differ from the article licence.
